# Supplementary material for: Facilely controlling the Förster energy transfer efficiency of dendron encapsulated conjugated organic molecular wire–CdSe quantum dot nanostructures
Source: Royal Society of Chemistry journal article supplement (doi:10.1039/c4nj01888e), 2014-12-24
Supplement: c4nj01888e1.pdf [file c4nj01888e1.pdf]

Electronic Supplementary Material (ESI) for New Journal of Chemistry.

This journal is © The Royal Society of Chemistry 2014

## Supporting Information

### Facilely Controlling the Förster Energy Transfer Efficiency of Dendrimer Encapsulated Conjugated Organic Molecular Wires/CdSe quantum dot Nanostructures

Hua-Yan Si<sup>a,b\*</sup>, Le-Jia Wang<sup>c</sup>, Wen-Jie Feng<sup>a</sup>, Hao-Li Zhang<sup>c\*</sup>, Hao Zhu<sup>a</sup>, Jin-Jin  
Zhao<sup>a</sup>, Yan-Ting Li<sup>a</sup>,

<sup>a</sup>School of Materials Science and Engineering, Shijiazhuang Tiedao University,  
Shijiazhuang 050043, China

<sup>b</sup>Hebei Provincial Key Laboratory of Traffic Engineering materials, Shijiazhuang  
050043, China

<sup>c</sup>State Key Laboratory of Applied Organic Chemistry, College of Chemistry and  
Chemical Engineering, Lanzhou University, 730000 Lanzhou, China

E-mail: dsscnewman@163.com; haoli.zhang@lzu.edu.cn

The fluorescence quantum yields ( $\phi_f$ ) of CdSe QDs and the Den-OPEs solutions were measured and reported using quinine sulfate as a standard [16]. The quantum yields were obtained with the following equation (F denotes fluorescence intensity at each wavelength,  $\Sigma[F]$  was calculated by summation of fluorescence intensity). Therefractive indices of  $\text{CHCl}_3$  ( $n_{\text{CHCl}_3} = 1.445$ ) and  $\text{H}_2\text{O}$  ( $n_{\text{H}_2\text{O}} = 1.33$ ) were used in the calculation to take into account the effect of different refractive indices of the reference and sample solution [18]:

$$\phi_f^{\text{sample}} = \frac{\phi_f^{\text{sample}} \times n_{\text{CHCl}_3}^2 \times \text{Abs}^{\text{standard}} \times \Sigma(F^{\text{sample}})}{n_{\text{H}_2\text{O}}^2 \times \Sigma(F^{\text{standard}}) \times \text{Abs}^{\text{sample}}}$$

Table S1 the quantum yield of all samples were measured. (A) simple samples; (B) composite samples ; (C) the comparative quantum yield of composite samples and simple samples.

(A)

| Molecular name | Wavelength(nm) | Absorption | $\Sigma[F]$ | $F_U/A_U$ | $\phi_1(\%)$ |
|----------------|----------------|------------|-------------|-----------|--------------|
| Den0-OPE       | 370            | 1.210      | 206524      | 170681    | 93           |
| Den1-OPE       | 370            | 1.380      | 126038      | 173933    | 94.8         |
| Den2-OPE       | 370            | 1.500      | 265486      | 176991    | 96.4         |
| CdSe           | 515            | 0.732      | 4714        | 6739      | 3.6          |

(B)

| Molecular name | Wavelength(nm) | Absorption | $\Sigma[F]$ | $F_U/A_U$ | $\phi_2(\%)$ |
|----------------|----------------|------------|-------------|-----------|--------------|
| Den0-OPE/CdSe  | 515            | 0.200      | 2924        | 14623     | 7.8          |
| Den1-OPE/CdSe  | 515            | 0.342      | 6960        | 20351     | 10.9         |
| Den2-OPE/CdSe  | 515            | 0.253      | 9070        | 35851     | 19           |
| Den0-OPE/CdSe  | 370            | 1.271      | 54532       | 78290     | 23.38        |
| Den1-OPE/CdSe  | 370            | 0.570      | 4463        | 42904     | 18.32        |
| Den2-OPE/CdSe  | 370            | 0.496      | 15937       | 32131     | 17.5         |

(C)

| molecular name                    | Den0-OPE | Den1-OPE | Den2-OPE | CdSe | CdSe | CdSe |
|-----------------------------------|----------|----------|----------|------|------|------|
| simple molecule( $\phi_1$ )(%)    | 93.0     | 94.8     | 96.4     | 3.6  | 3.6  | 3.6  |
| Composite molecule( $\phi_2$ )(%) | 23.38    | 18.32    | 17.50    | 7.8  | 10.9 | 19.0 |
| $\phi_2/\phi_1$                   | 0.25     | 0.19     | 0.18     | 2.17 | 3.03 | 5.28 |

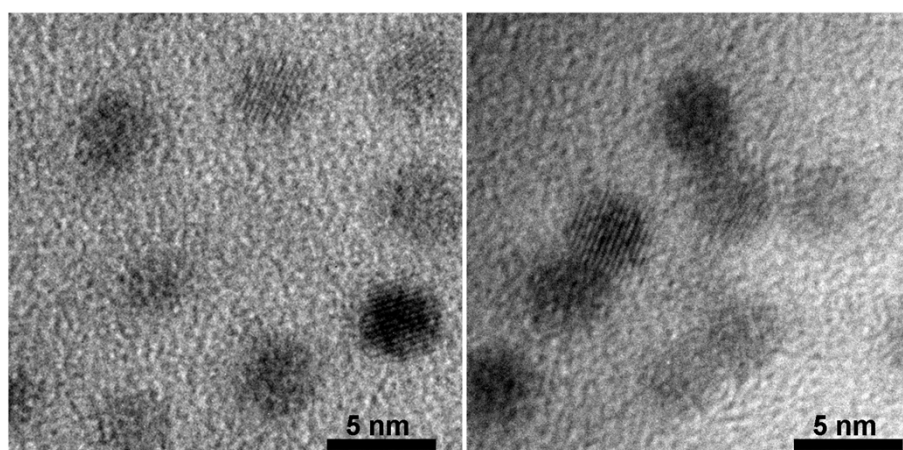

**Fig. S1** HRTEM images of (A) TOPO-CdSe and (B) Den0-OPE/CdSe drop-cast onto carbon-coated TEM grid.

HRTEM images of the TOPO-CdSe QDs and Den-OPEs/CdSe composites are shown in Fig. S1. As can be seen, mainly single QDs were present before TOPO exchange with the Den-OPEs (Fig. S1A). The size of QDs was around 4.0 nm in diameter. However, after Den-OPEs modified QDs, aggregates with same size and shape of the QDs were visible in Fig. S1B. These results confirm the controllable cross-linkage of QDs by Den-OPEs.

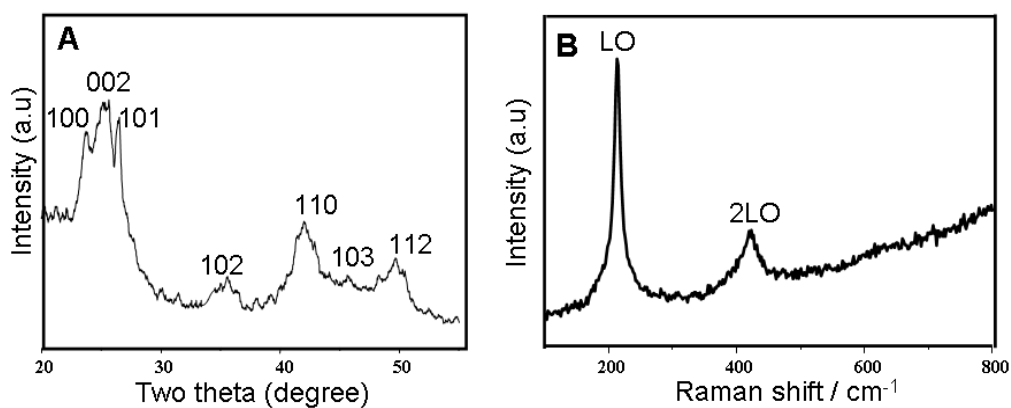

Fig. S2 (A) The powder X-ray diffraction pattern of CdSe QDs; (B) Raman spectra of CdSe QDs in chloroform at the 480 nm excitation wavelengths.

The X-ray diffraction patterns (Fig. S2A) of CdSe QDs exhibited diffraction patterns similar to those of almost perfect wurtzite CdSe QDs [3]. Fig. S2B showed representative polarized Raman spectra of CdSe QDs in chloroform at 480 nm excitation wavelengths. The dominant CdSe feature was the “LO phonon” centered

near  $210\text{ cm}^{-1}$  and the overtone of the LO phonon, centered near  $415\text{ cm}^{-1}$ , which were in accordance with the wurtzite CdSe QDs [4].

References:

[1] W.H. Melhuish, J. Phys. Chem. 65 (1961) 229.

[2] D.F. Eaton, Pure Appl. Chem. 60 (1988) 1107.

[3] L. Qu, Z. A. Peng, X. Peng, Nano Lett. 1(2001), 333.

[4] J. A. Baker, D. F. Kelley, A. M. Kelley, J. Chem. Phys. 139(2013), 024702.
